# Supplementary material for: What Is the Relationship between Trunk Control Function and Arm Coordination in Adults with Severe-to-Moderate Quadriplegic Cerebral Palsy?
Source: MDPI journal article supplement (doi:10.3390/ijerph20010141), 2022-12-22
Supplement: s1 [file s1]

## What is the relationship between trunk control function and arm coordination in adults with severe-to-moderate quadriplegic cerebral palsy?

María Isabel Cornejo, Alba Roldan, Raul Reina

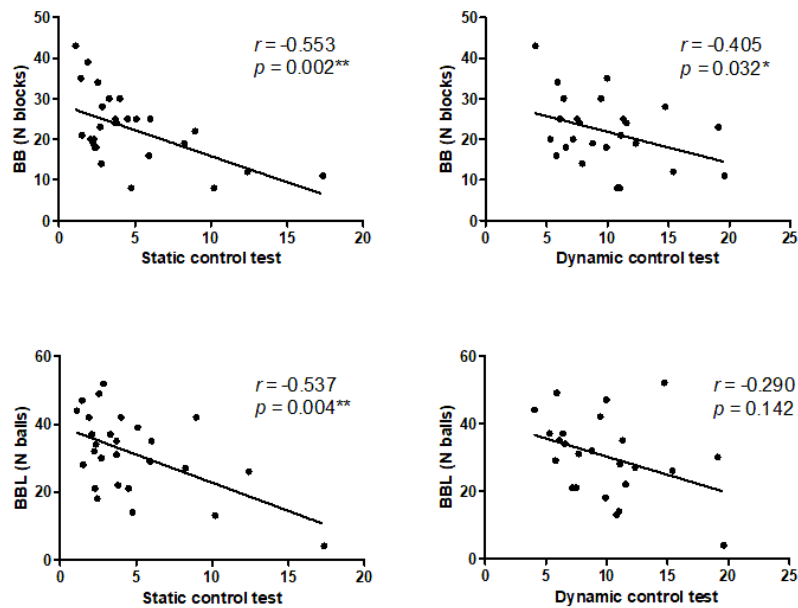

**Figure S1.** Pearson product correlation between manual dexterity and the dynamic and static control tests. BB = Box and Block test; BBL = Box and Ball test.

## What is the relationship between trunk control function and arm coordination in adults with severe-to-moderate quadriplegic cerebral palsy?

María Isabel Cornejo, Alba Roldan, Raul Reina

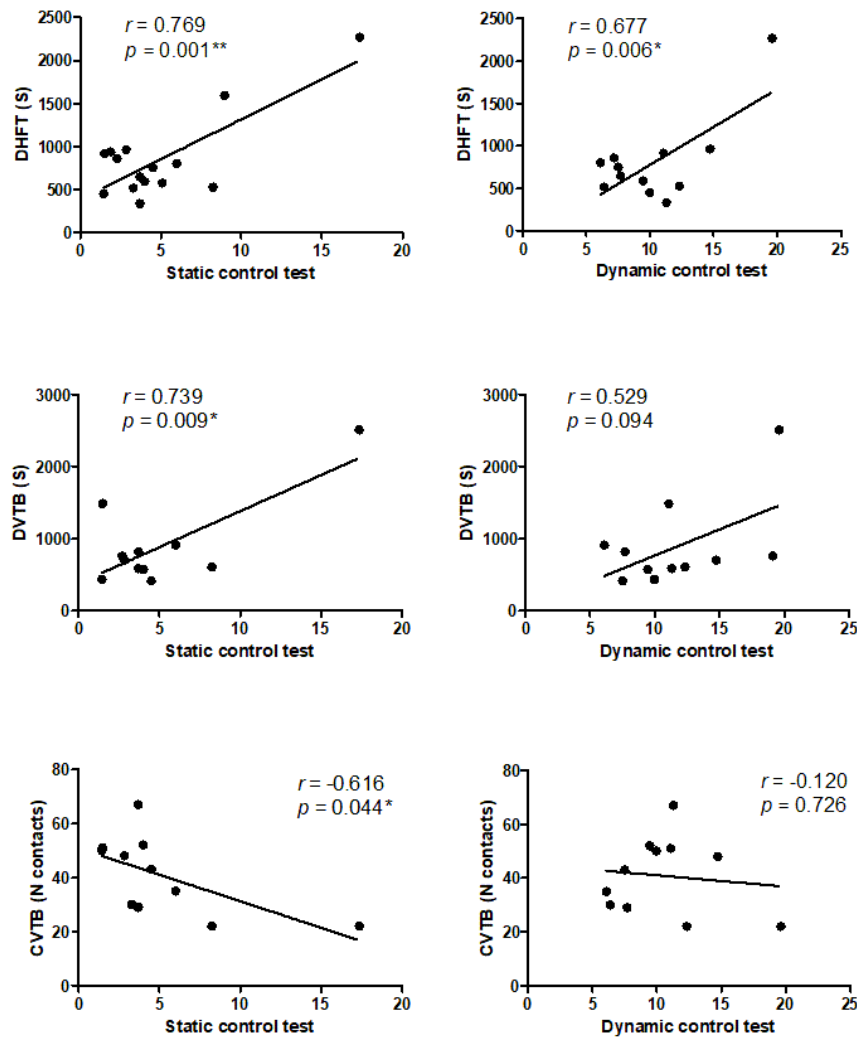

**Figure S2.** Pearson product correlation between intra-limb coordination and static and dynamic trunk control tests. DHFT = Discrete Horizontal Finger Tapping test; DVTB = Discrete Vertical Tapping with Ball test; CVTB = Continuous Vertical Tapping with Ball test.
